# Supplementary material for: Design and Evaluation of a Polypeptide That Mimics the Integrin Binding Site for EDA Fibronectin to Block Profibrotic Cell Activity
Source: PubMed Central journal article supplement (PMC7913925; doi:10.3390/ijms22041575), 2021-02-04
Supplement: ijms-22-01575-s001.pdf [file ijms-22-01575-s001.pdf]

# Design and evaluation of a polypeptide that mimics the integrin binding site for EDA fibronectin to block pro-fibrotic cell activity

Lin Zhang<sup>1</sup>, Hongyu Yan<sup>1</sup>, Yifan Tai<sup>1</sup>, Yueming Xue<sup>1</sup>, Yongzhen Wei<sup>1</sup>, Kai Wang<sup>1</sup>, Qiang Zhao<sup>1</sup>, Shufang Wang<sup>1,\*</sup>, Deling Kong<sup>1,2,\*</sup> and Adam C. Midgley<sup>1,2,\*</sup>

<sup>1</sup> Key Laboratory of Bioactive Materials, Ministry of Education, College of Life Sciences, Nankai University, Tianjin, 300071, China

<sup>2</sup> Rongxiang Xu Center for Regenerative Life Science, State Key Laboratory of Medicinal Chemical Biology, College of Life Sciences, Nankai University, Tianjin, 300071, China

\* Correspondence: wangshufang@nankai.edu.cn (S.W.); kongdeling@nankai.edu.cn (D.K.); midgleyac@nankai.edu.cn, Tel.: +86-1562-004-7851 (A.C.M.)

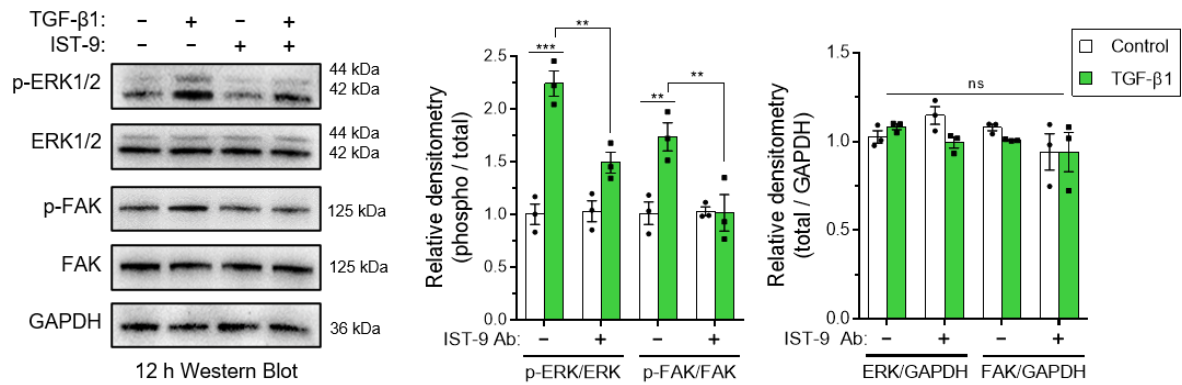

**Figure 1. IST-9 antibody blockade of ERK1/2 and FAK signaling at 12 h post-TGF-β1 treatment.** NIH/3T3 cells were incubated in the presence or absence of 10 ng/mL TGF-β1 with or without IST-9 antibody for 12 h, before assessment of ERK1/2 and FAK protein expression and phosphorylation. Immunoblots are displayed alongside corresponding densitometry analysis of phospho-protein/total-protein and total-protein/GAPDH loading control. Blots and data are representative of three independent experiments and data is shown as the mean ± S.E. Statistical analysis is shown as \*\*\* $p \leq 0.001$ , \*\* $p \leq 0.01$ , ns = no statistical significance ( $p > 0.05$ ).

| Model | GA341 | zDOPE | Estimated RMSD | Estimated Overlap (3.5Å) |
|-------|-------|-------|----------------|--------------------------|
| #1.1  | 1.00  | -1.04 | 1.890          | 0.937                    |
| #1.2  | 1.00  | -1.04 | 2.211          | 0.922                    |
| #1.3  | 1.00  | -1.05 | 2.260          | 0.927                    |
| #1.4  | 1.00  | -1.07 | 1.839          | 0.932                    |
| #1.5  | 1.00  | -1.08 | 2.158          | 0.927                    |

**Figure S2.** Modeller scores for ITGB1 mapped to the ITGB7 template.

**PROCHECK Summary**  
 Total residues: 966 residues  
 Ramachandran plot: 81.7% most favoured region  
                           17.0% additional allowed region  
                           0.7% generously allowed region  
                           0.6% disallowed region  
 All Ramachandrans: 42 labelled residues (out of 955)  
 Chi1-chi2 plots: 8 labelled residues (out of 583)  
 Side-chain parameters: 5 better; 0 inside; 0 worse  
 Residue properties: Max.deviation: 16.2; Bad contacts: 22  
                                           Bond len/angle: 9.0; Morris et al class: 1 1 2  
 2 cis-peptides  
 G-factors Dihedrals: -0.22; Covalent: 0.31; Overall: -0.01  
 Planar groups: 100.0% within limits; 0.0% highlighted

Figure S3. PROCHECK pass results for the  $\alpha 4\beta 1$  3D receptor model.

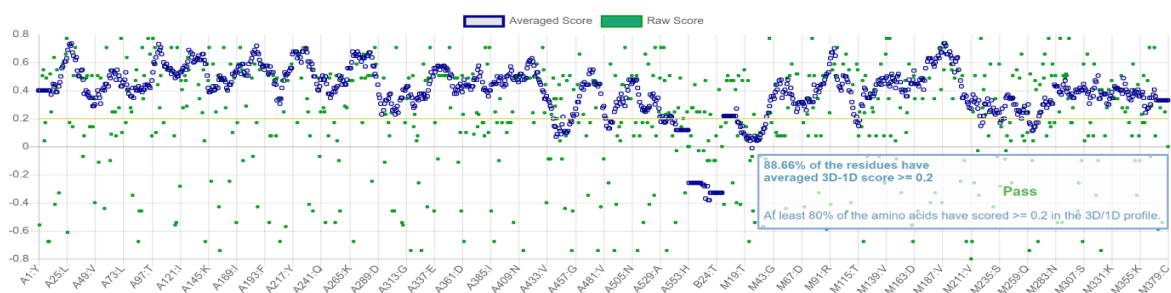

Figure S4. Verify3D pass results for the  $\alpha 4\beta 1$  3D receptor model.
